# Supplementary material
Source: MDPI journal article supplement (https://www.mdpi.com/2075-163X/11/9/920)
Supplement: s1 [file s1]

SUPPLEMENTARY MATERIALS: EPMA METHODOGOLOY

Table S1. EPMA setup for analysis

| Element<br>and Line | Diffracting<br>Crystal (Sp#) | Background<br>type/fit | kV/nA/spot<br>size(μm) | Peak<br>Count<br>Time | Bkgd Count Times (per pt) |    | # bkgd<br>points<br>acquired<br>(Lo/Hi) | Standards*          |                           | Average DL (99% CI) on<br>sample (ppm) |
|---------------------|------------------------------|------------------------|------------------------|-----------------------|---------------------------|----|-----------------------------------------|---------------------|---------------------------|----------------------------------------|
|                     |                              |                        |                        |                       | Lo                        | Hi |                                         | Primary<br>Standard | Interference<br>Standards |                                        |
| S Ka                | LPET (1)                     | Multipoint             | 20/20/0                | 15                    | 10                        | 10 | 2/2                                     | 566                 | 584                       | 120                                    |
| Bi Ma               | LPET (1)                     | Multipoint             | 20/20/0                | 15                    | 10                        | 10 | 2/2                                     | 1400                | 582/584                   | 640                                    |
| Pb Ma               | LPET (1)                     | Multipoint             | 20/20/0                | 15                    | 10                        | 10 | 2/2                                     | 566                 | 530/798                   | 660                                    |
| Cd La               | LPET (1)                     | Multipoint             | 20/20/0                | 30                    | 15                        | 15 | 0/3                                     | 561                 | 530/732/778               | 560                                    |
| Se La               | TAP (2)                      | Multipoint             | 20/20/0                | 30                    | 15                        | 15 | 1/2                                     | 568                 | 581/585/790/798/800       | 370                                    |
| As La               | TAP (2)                      | Multipoint             | 20/20/0                | 30                    | 15                        | 15 | 3/0                                     | 562                 | 530/585/790/798           | 430                                    |
| Fe Ka               | LLIF (3)                     | Multipoint             | 20/20/0                | 30                    | 15                        | 15 | 2/2                                     | 556                 | 582                       | 240                                    |
| Mn Ka               | LLIF (3)                     | Multipoint             | 20/20/0                | 30                    | 15                        | 15 | 1/1                                     | 557                 | 800                       | 270                                    |
| Cu Ka               | LLIF (3)                     | Multipoint             | 20/20/0                | 15                    | 10                        | 10 | 1/1                                     | 556                 |                           | 390                                    |
| Te La               | LPET (4)                     | Multipoint             | 20/20/0                | 30                    | 15                        | 15 | 0/3                                     | 1400                | 581/582/584/585/732       | 350                                    |
| Sb La               | LPET (4)                     | Multipoint             | 20/20/0                | 30                    | 15                        | 15 | 1/3                                     | 544                 | 790/798                   | 370                                    |
| Ag La               | LPET (4)                     | Multipoint             | 20/20/0                | 20                    | 10                        | 10 | 1/1                                     | 560                 | 557                       | 750                                    |
| Zn Ka               | LLIF (5)                     | Multipoint             | 20/20/0                | 30                    | 15                        | 15 | 1/1                                     | 564                 |                           | 300                                    |
| Au La               | LLIF (5)                     | Multipoint             | 20/20/0                | 70                    | 35                        | 35 | 1/1                                     | 584                 | 564                       | 650                                    |

\* Standard # refers to internal database. Full list of standards in Table S3

Table S2. Interference corrections

| Element<br>and Line | Diffracting<br>Crystal (Sp#) | Standards*          |                           | Overlapping element and order/interference correction standard |          |                     |          |                     |          |                     |          |                     |          |
|---------------------|------------------------------|---------------------|---------------------------|----------------------------------------------------------------|----------|---------------------|----------|---------------------|----------|---------------------|----------|---------------------|----------|
|                     |                              | Primary<br>Standard | Interference<br>Standards | Interfering<br>line                                            | Int. std | Interfering<br>line | Int. std | Interfering<br>line | Int. std | Interfering<br>line | Int. std | Interfering<br>line | Int. std |
| S Ka                | LPET (1)                     | 566                 | 584                       | Au LB3 (V)                                                     | 584      |                     |          |                     |          |                     |          |                     |          |
| Bi Ma               | LPET (1)                     | 1400                | 582/584                   | Pb Mb (I)                                                      | 582      | Au LA1 (IV)         | 584      |                     |          |                     |          |                     |          |
| Pb Ma               | LPET (1)                     | 566                 | 530/798                   | Fe KB1 (III)                                                   | 530      | Bi LI (IV)          | 798      |                     |          |                     |          |                     |          |
| Cd La               | LPET (1)                     | 561                 | 530/732/778               | Fe KA1 (II)                                                    | 530      | Ag LB1              | 732      | Se KB1 (IV)         | 778      |                     |          |                     |          |
| Se La               | TAP (2)                      | 568                 | 581/585/790/798/800       | Cd LI (II)                                                     | 581      | Sb LB2 (III)        | 585      | Te LB3 (III)        | 790      | Bi MG (II)          | 798      | As LB3              | 800      |
| As La               | TAP (2)                      | 562                 | 530/585/790/798           | Fe KA1 (V)                                                     | 530      | Sb LB4 (III)        | 585      | Te LA1 (III)        | 790      | Bi MB (II)          | 798      |                     |          |
| Fe Ka               | LLIF (3)                     | 556                 | 582                       | Pb LB3 (II)                                                    | 582      |                     |          |                     |          |                     |          |                     |          |
| Mn Ka               | LLIF (3)                     | 557                 | 800                       | As KB1 (II)                                                    | 800      |                     |          |                     |          |                     |          |                     |          |
| Cu Ka               | LLIF (3)                     | 556                 |                           |                                                                |          |                     |          |                     |          |                     |          |                     |          |
| Te La               | LPET (4)                     | 1400                | 581/582/584/585/732       | Cd LG1                                                         | 581      | Pb LG1 (IV)         | 582      | Au LB4 (III)        | 584      | Sb LB1              | 585      | Ag LG3              | 732      |
| Sb La               | LPET (4)                     | 544                 | 790/798                   | Te Ln                                                          | 790      | Bi LA1 (III)        | 798      |                     |          |                     |          |                     |          |
| Ag La               | LPET (4)                     | 560                 | 557                       | Mn SKA3 (II)                                                   | 557      |                     |          |                     |          |                     |          |                     |          |
| Zn Ka               | LLIF (5)                     | 564                 |                           |                                                                |          |                     |          |                     |          |                     |          |                     |          |
| Au La               | LLIF (5)                     | 584                 | 564                       | Zn KB1                                                         | 564      |                     |          |                     |          |                     |          |                     |          |

\* Standard # refers to internal database. Full list of standards in Table S3

**Table S3.** Standard information

| <b>Reference<br/>#</b> | <b>Mineral composition</b> | <b>Natural/Synthetic</b> | <b>Manufacturer</b> |
|------------------------|----------------------------|--------------------------|---------------------|
| 530                    | Marcasite                  | Natural                  | Astimex             |
| 544                    | Stibnite                   | Natural                  | Astimex             |
| 556                    | Chalcopyrite               | Natural                  | P&H and Associates  |
| 557                    | Rhodonite                  | Natural                  | P&H and Associates  |
| 560                    | Silver Telluride           | Synthetic                | P&H and Associates  |
| 561                    | Greenockite                | Natural                  | P&H and Associates  |
| 562                    | Gallium Arsenide           | Synthetic                | P&H and Associates  |
| 564                    | Sphalerite                 | Natural                  | P&H and Associates  |
| 566                    | Galena                     | Natural                  | P&H and Associates  |
| 568                    | Bismuth Selenide           | Synthetic                | P&H and Associates  |
| 581                    | Cadmium metal              | Synthetic                | Astimex             |
| 582                    | Lead metal                 | Synthetic                | Astimex             |
| 584                    | Gold                       | Synthetic                | Astimex             |
| 585                    | Antimony metal             | Synthetic                | Astimex             |
| 732                    | Silver metal               | Synthetic                | C.M. Taylor         |
| 778                    | Selenium metal             | Synthetic                | C.M. Taylor         |
| 790                    | Tellurium metal            | Synthetic                | C.M. Taylor         |
| 798                    | Bismuth metal              | Synthetic                | C.M. Taylor         |
| 800                    | Indium Arsenide            | Synthetic                | C.M. Taylor         |
| 1400                   | Bismuth Telluride          | Synthetic                | P&H and Associates  |

## SUPPLEMENTARY MATERIALS: FIGURES

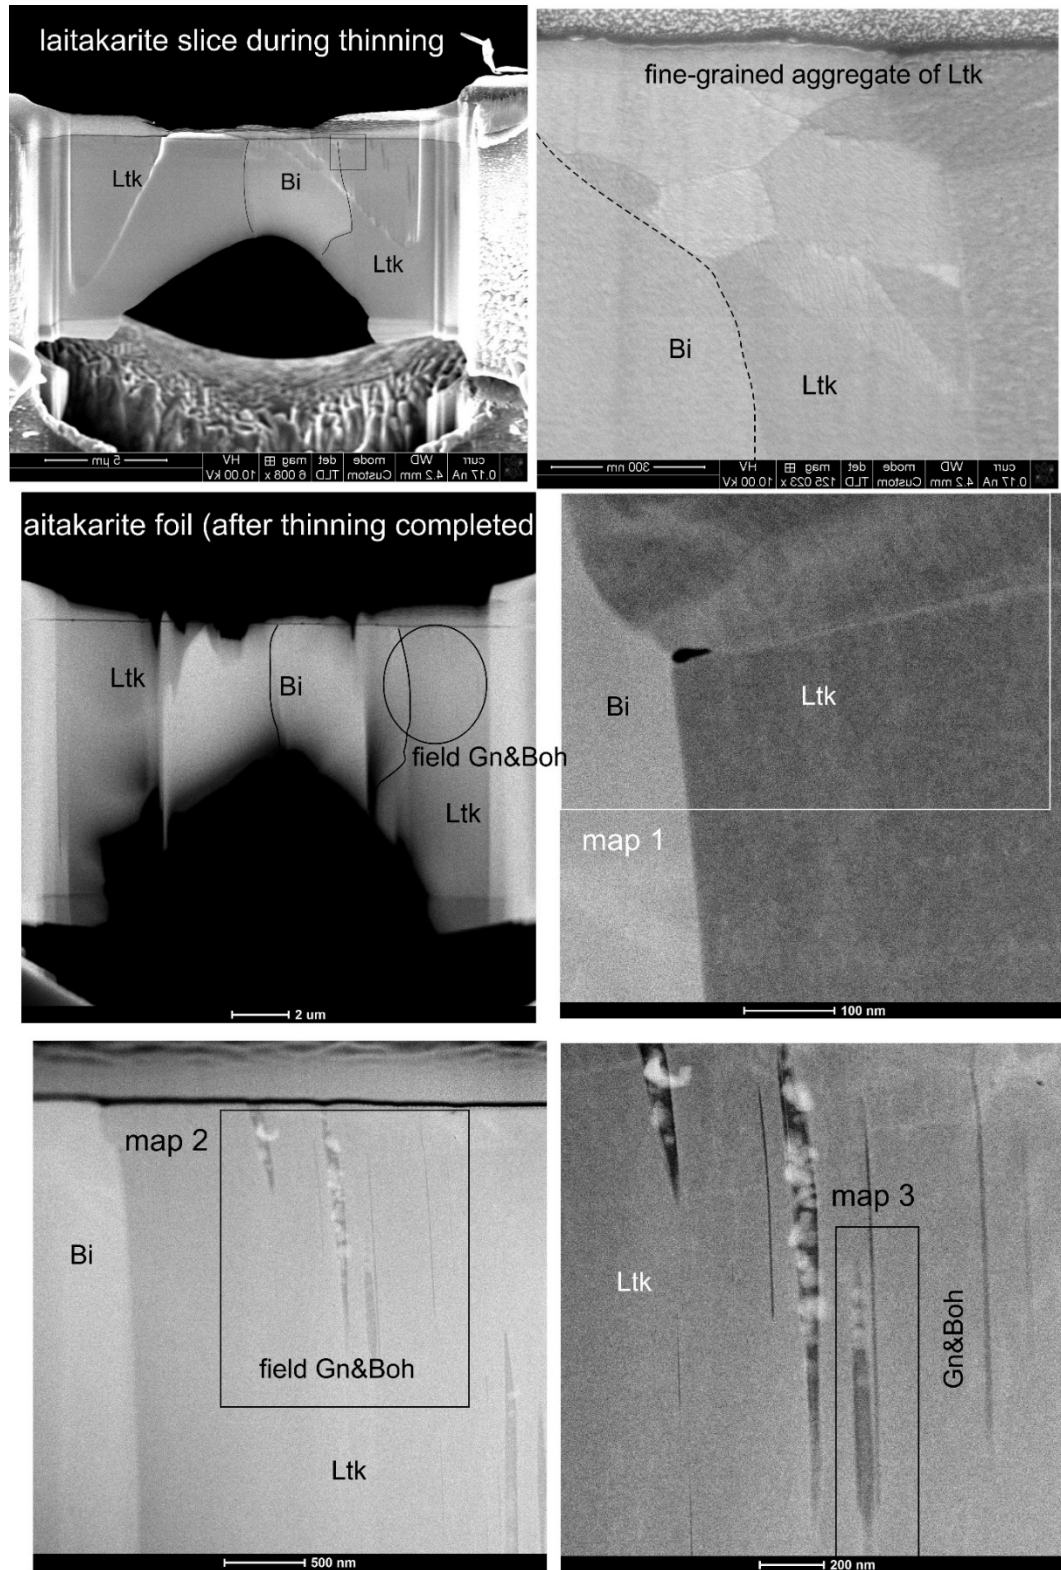

**Figure S1.** Secondary electron (top) and HAADF STEM images (middle and bottom) showing aspects of the laitarite foil (Ltk). Location of maps in Figures 5A, B and 11 are marked as Map1-3. Bi-native bismuth; Boh-bohdanowiczite; Gn-galena.

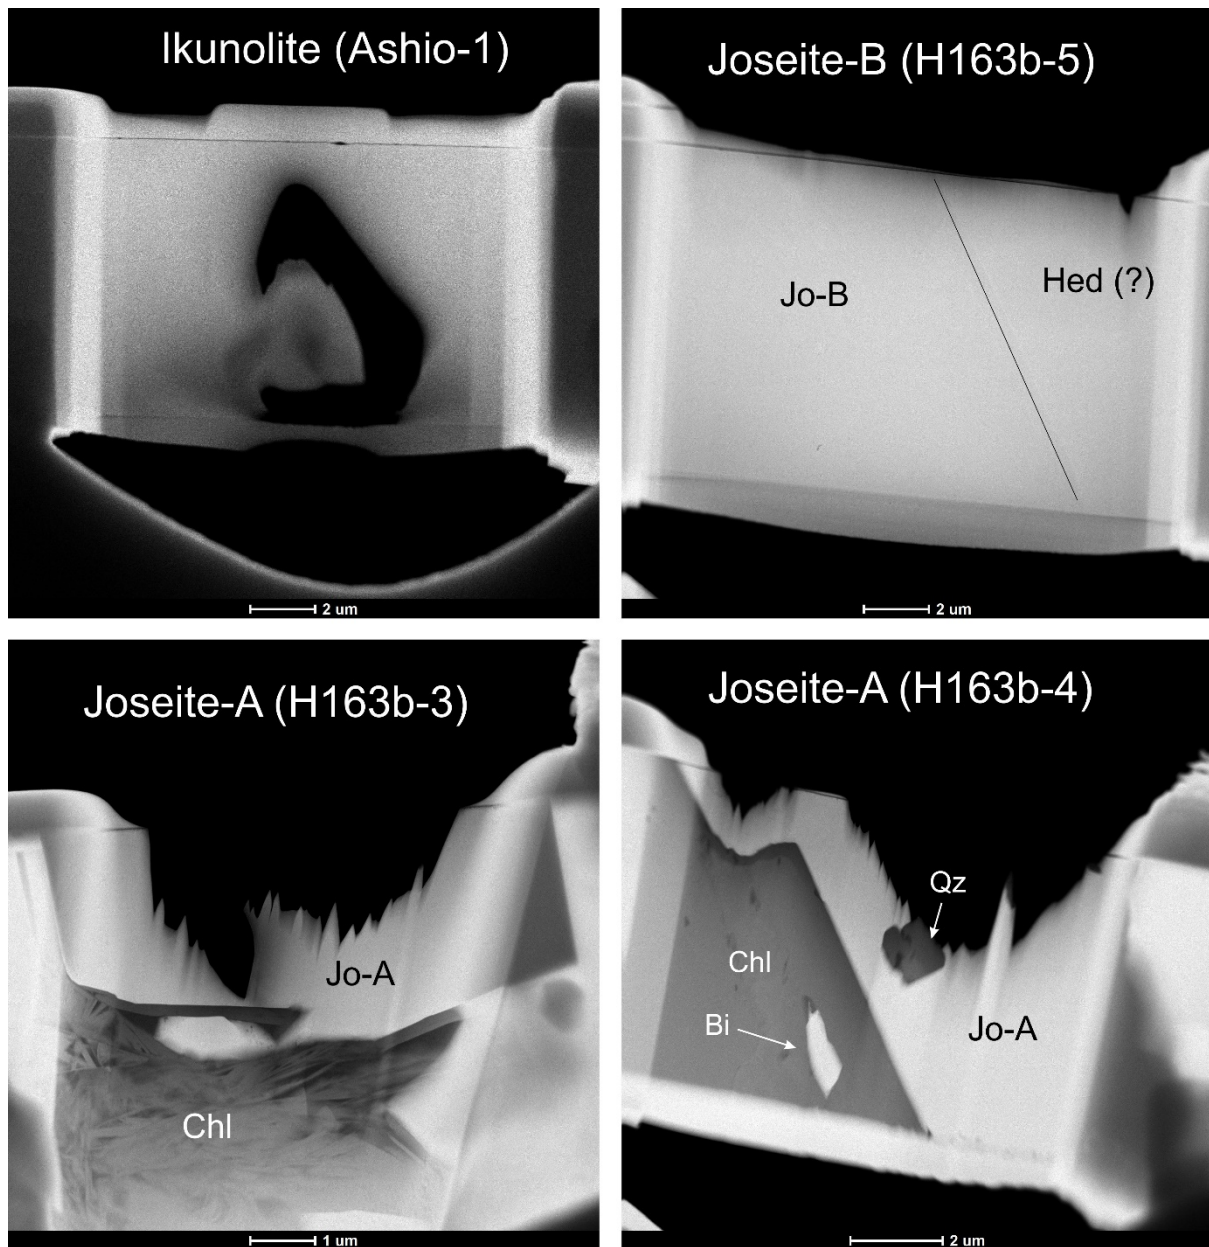

**Figure S2.** HAADF STEM images showing aspects of the foils studied for: ikunolite, joséite-B (Jo-B) and joséite-A (Jo-A). Bi-native bismuth; Chl-chlorite; Hed-hedleyite; Qz-quartz.
